# Supplementary material
Source: PubMed Central journal article supplement (PMC3199608)
Supplement: NIHMS327440-supplement-Supp_Data.pdf [file NIHMS327440-supplement-Supp_Data.pdf]

*a*

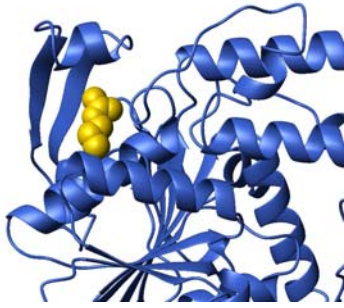

*b*

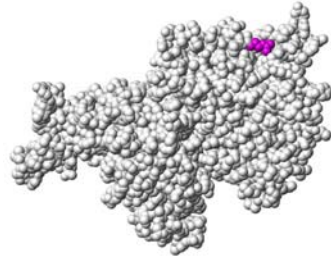

**Supplementary Figure 1. Homology model of mut-snf2h.** **a.** Ribbon representation showing the sidechain of Arg520 in yellow. **b.** CPK representation showing the sidechain of Arg520 in magenta on the surface of the molecule.

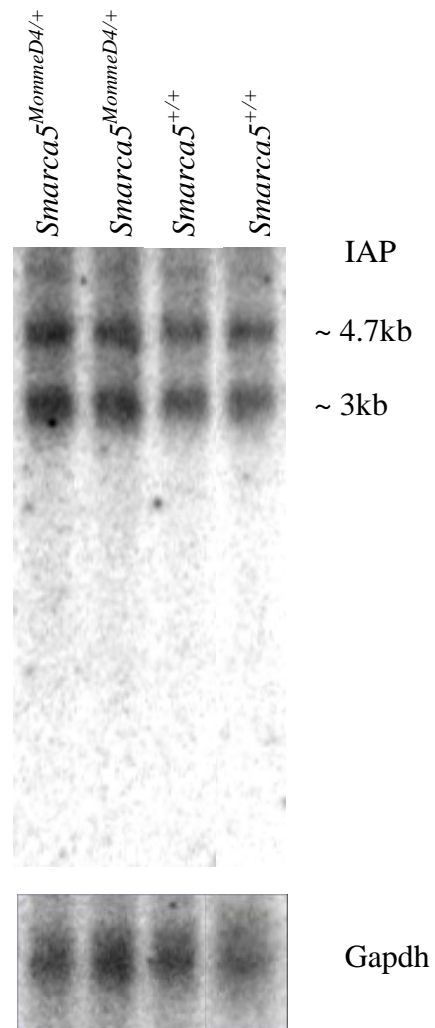

**Supplementary Figure 2. Northern analysis of IAP RNA in *Smarca5*<sup>Momme D4/+</sup> testes. No abnormal IAP mRNA transcripts were detected in *Smarca5*<sup>Momme D4/+</sup> testes.**

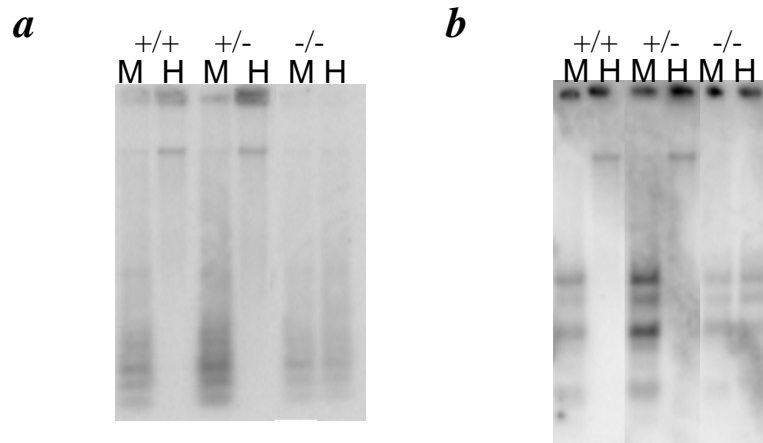

**Supplementary Figure 3. DNA methylation analysis of repeats in *Dnmt1*<sup>MommeD2</sup> embryos .** DNA from *Dnmt1*<sup>MommeD2</sup> wildtype, heterozygous and homozygous embryos (8.5 dpc) were digested with HpaII (H) and MspI (M) and hybridised with **a.** a probe for minor satellite DNA and **b.** a probe for an IAP retrotransposon.

*Mtm1*

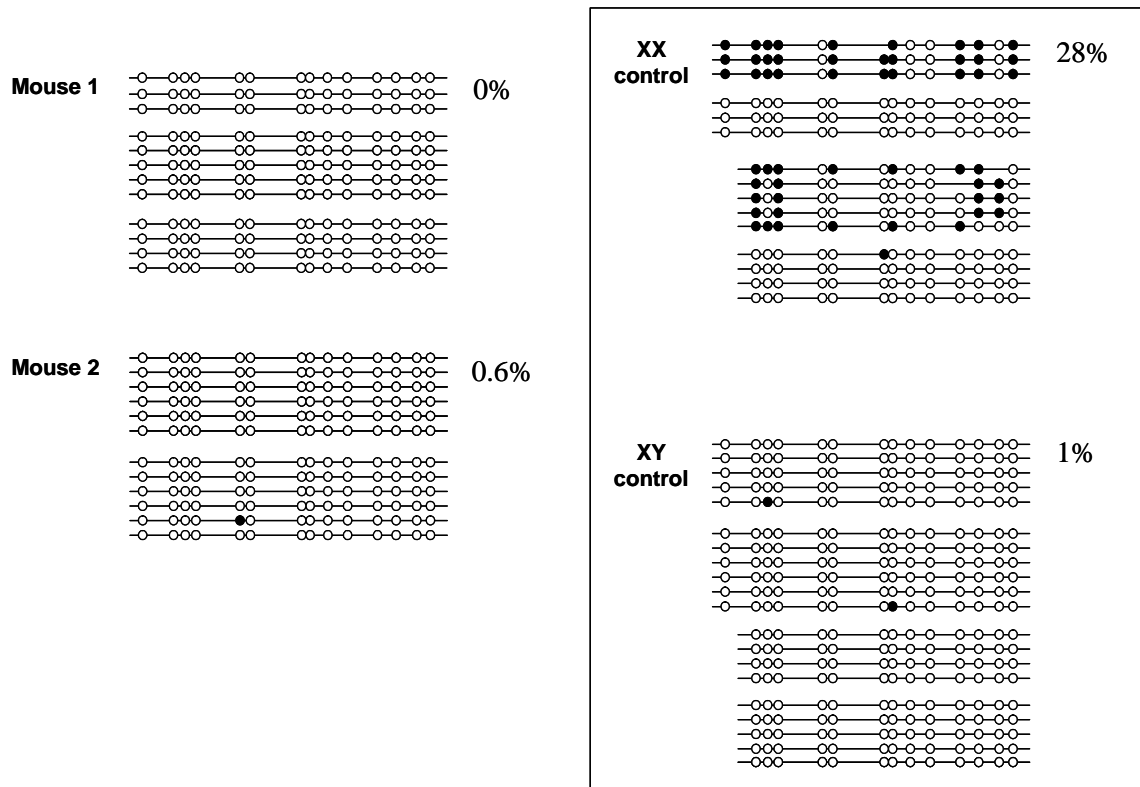

**Supplementary Figure 4. Methylation at the *Mtm1* CpG island in Mouse 1 and Mouse 2.** Mouse 1 and Mouse 2 are two of the three female mice which displayed no methylation at the X-linked *Hprt* gene (see Figure 5). No DNA was available from Mouse 3.

**a**

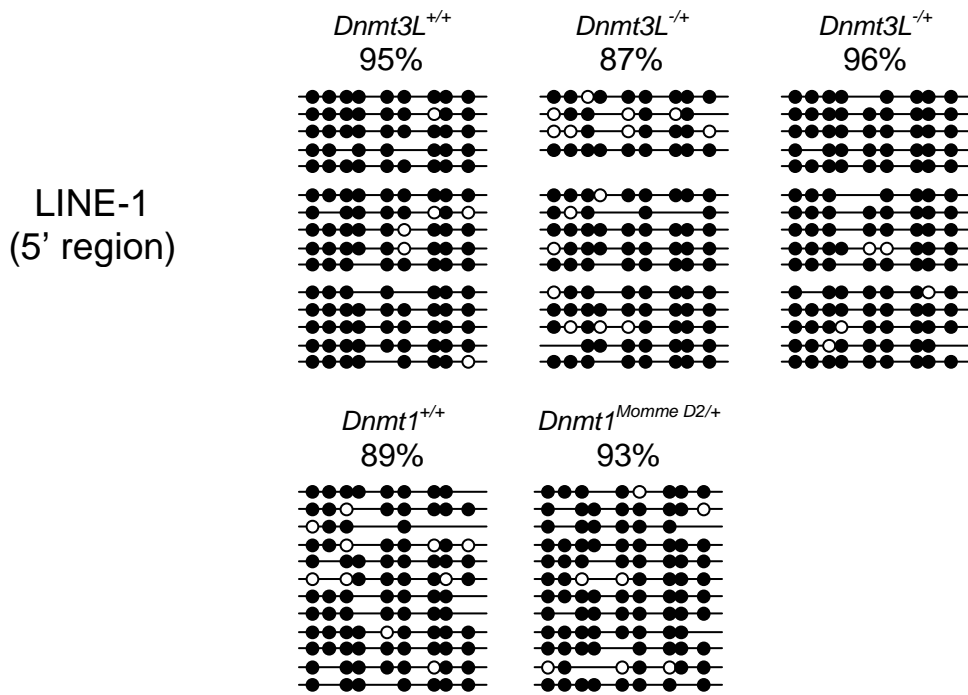

**b**

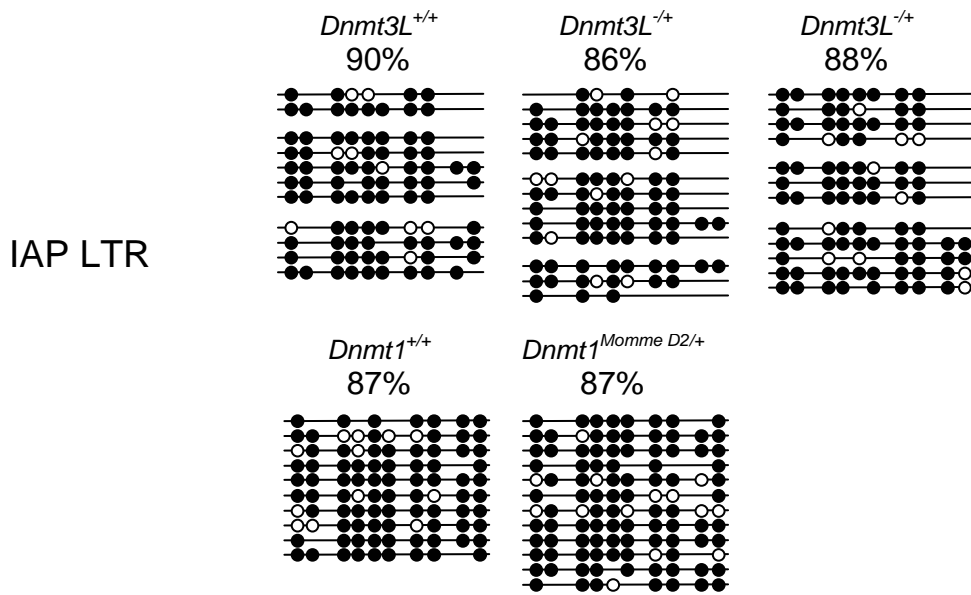

**c**

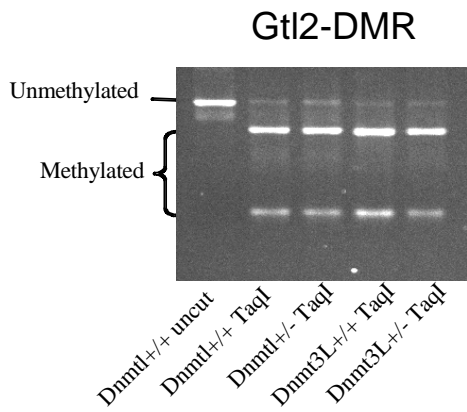

**d**

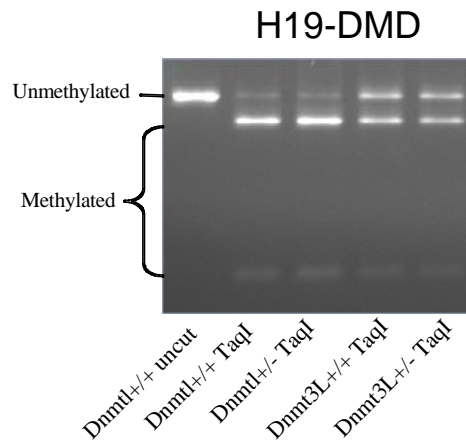

**Supplementary Figure 5. Methylation analysis of DNA from the sperm of *Dnmt1*<sup>Momme D2/+</sup> and *Dnmt3L*<sup>-/-</sup> mice.** Bisulphite sequencing of **a.** LINE-1 and **b.** IAP LTR. (for primers see <sup>46</sup>) **c.** Methylation at the Gtl2-DMR. **d.** Methylation at the H19-DMD (for methods see <sup>49</sup>).

**Supplementary Table 1. Genes in the *Momme D4* linked interval.**

| Gene                          | Ensembl Gene ID           | Gene start (bp) | Gene end (bp)   |
|-------------------------------|---------------------------|-----------------|-----------------|
| <i>HIP</i>                    | ENSMUSG00000064325        | 82866417        | 82954078        |
|                               | ENSMUSG00000044691        | 83006878        | 83007712        |
| <i>Gypa</i>                   | ENSMUSG00000051839        | 83389800        | 83405220        |
| <i>4930505O20Rik</i>          | ENSMUSG00000044588        | 83408135        | 83408878        |
| <i>Frem3</i>                  | ENSMUSG00000042353        | 83506826        | 83591102        |
| <b><i>Smarca5 (Snf2h)</i></b> | <b>ENSMUSG00000031715</b> | <b>83595689</b> | <b>83635205</b> |
| <i>Gab1</i>                   | ENSMUSG00000031714        | 83660180        | 83776225        |
| <i>Usp38</i>                  | ENSMUSG00000038250        | 83876479        | 83910652        |
|                               | ENSMUSG00000037982        | 83909322        | 83934330        |
|                               | ENSMUSG00000056170        | 84093373        | 84094094        |

Based on Ensembl build 36

**Supplementary Table 2. *Smarca5*<sup>MommeD4</sup> phenotypes.**

**a. Number of homozygous mutant embryos produced from *Smarca5*<sup>Momme D4/+</sup> intercross in the inbred FVB background**

| Genotype     | 14.5 dpc        |          | 17.5 dpc        |          |
|--------------|-----------------|----------|-----------------|----------|
|              | Observed        | Expected | Observed        | Expected |
| Homozygous   | 15 <sup>†</sup> | 19       | 12 <sup>‡</sup> | 13.5     |
| Heterozygous | 40              | 38       | 30              | 27       |
| Wildtype     | 22              | 19       | 12              | 13.5     |
| Total        | 77              |          | 54              |          |

<sup>†</sup> Three of these embryos displayed an abnormal phenotype

<sup>‡</sup> All but one of these embryos displayed an abnormal phenotype: four were white and regressing, consistent with macrophage invasion, and seven were anatomically normal but small.

**b. Body weight at weaning of *Smarca5*<sup>MommeD4/+</sup> mice**

Weight at 3 weeks of age (g)

| Male offspring                |                                 | Female offspring              |                                 |
|-------------------------------|---------------------------------|-------------------------------|---------------------------------|
| <i>Smarca5</i> <sup>+/+</sup> | <i>Smarca5</i> <sup>MD4/+</sup> | <i>Smarca5</i> <sup>+/+</sup> | <i>Smarca5</i> <sup>MD4/+</sup> |
| 11.9 ± 0.5                    | 10.7 ± 0.9                      | 11.5 ± 0.5                    | 10.3 ± 0.8                      |
| n=10                          | n=20                            | n=13                          | n=12                            |
| p<0.005                       |                                 | p<0.005                       |                                 |

Offspring were generated from *Smarca5*<sup>Momme D4</sup> heterozygous males crossed with wildtype females

**Supplementary Table 3. Primers**

| Name                 | Sequence                      |
|----------------------|-------------------------------|
| DXMit1F              | caagcaaccgaggaagacat          |
| DXMit1R              | caggatgctaataccacctgc         |
| DXMit117F            | gtaaaaccgcactgactaagcc        |
| DXMit117R            | ttcgcctctatcttactctggc        |
| Hprt4-L              | gatttttgagtttggttagatgtt      |
| Hprt4-R              | cacaaatataaattataacatctac     |
| Hprt4-Lint           | gtggggatgtttttagtgagtt        |
| Hprt4-Rint           | caaacctaaacataccctctcatac     |
| Mtm1SEQ-L            | ggggatttaggattggaaaggttgaagga |
| Mtm1SEQ-R            | taaccttcctaaacccaattccccattc  |
| Mtm1SEQLshort        | aggaaaaagtagggatttttgaga      |
| Mtm1SEQRshort        | taacacaaaaacactaaccaaaaa      |
| Mtm1L                | ttggttttattgtttattgttttag     |
| Mtm1R                | acattcttaataactattcacacttc    |
| MD4L                 | ggaatggctggcctaggta           |
| MD4R                 | ctcgtatgcaatacaatacaaaaca     |
| MD2L                 | cggcattccagatgattcc           |
| MD2R                 | tgtcagcctcggctctaac           |
| <i>Smarca5-ex11L</i> | cagcaggggaagatggacaaa         |
| <i>Smarca5-ex11R</i> | aacaccaccatcttgcact           |
